# Supplementary material
Source: PubMed Central journal article supplement (PMC6392444)
Supplement: NIHMS1520582-supplement-1.pdf [file NIHMS1520582-supplement-1.pdf]

# Supplemental Figures

**Supplementary Figure 1.**

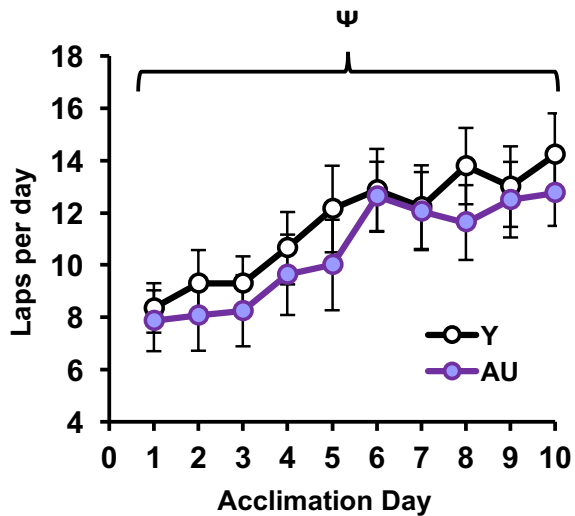

**Supplementary Figure 1.** The number of laps run during track acclimation increases over days but does not differ between ages. A repeated measures ANOVA shows an effect of day ( $\psi$ ,  $F(1,28) = 11.848$ ,  $p = 0.002$ ), with no effect of age ( $F(1,28) = 0.412$ ,  $p = 0.526$ ), nor interaction between age and day ( $F(1,28) = 0.311$ ,  $p = 0.581$ ).

## Supplementary Figure 2.

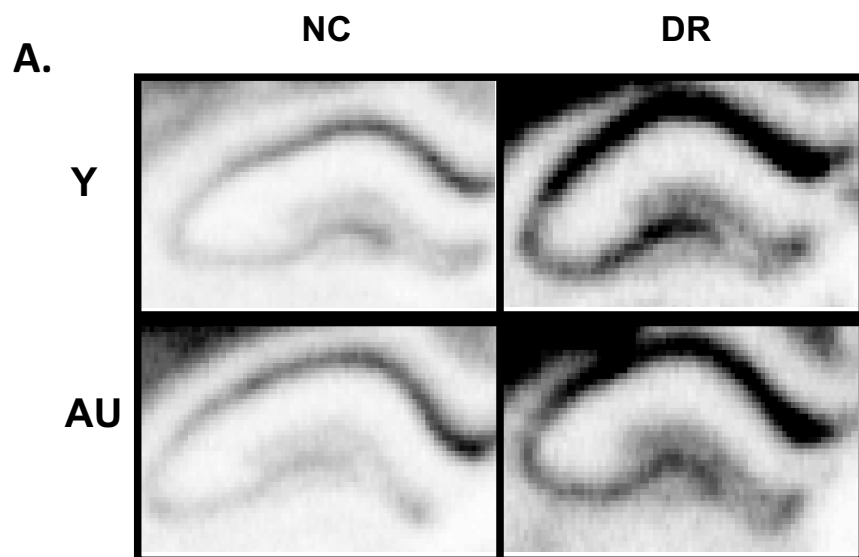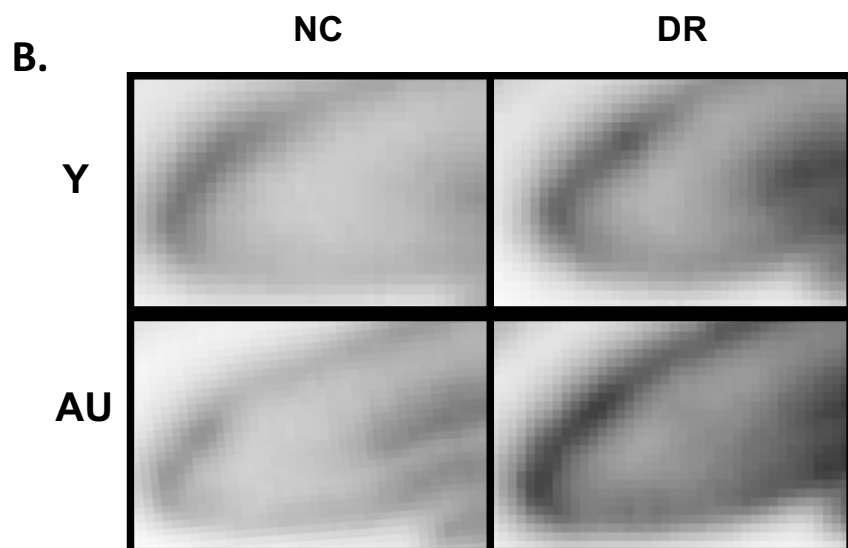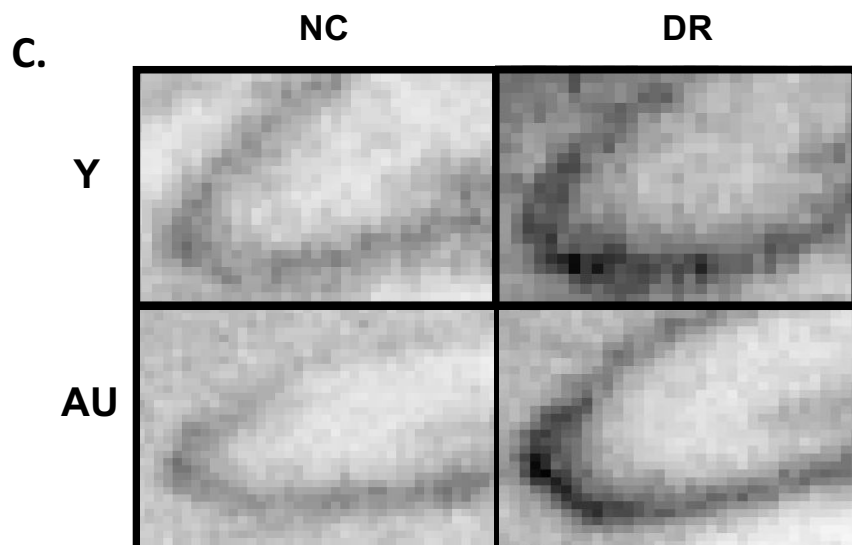

**Supplementary Figure 2.**  
Representative images of A.  
Zif268, B. Camk2A, and C. Nlgn1  
in situ hybridization. Original  
greyscale images of those shown  
in Figure 3F, H, and J as heat  
map images

### Supplemental Figure 3.

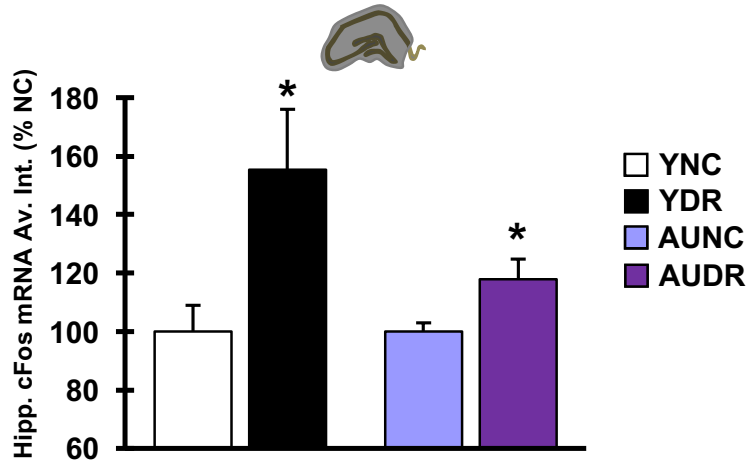

**Supplementary Figure 2.** cFos mRNA is increased with cue rotation in whole hippocampus. In situ hybridization of cFos mRNA shows increased expression in DR rats relative to NC rats for both Y and AU age groups. 1W ANOVA: Y:  $F(1,13) = 6.041$ ,  $p = 0.03$ ; AU:  $F(1,15) = 4.649$ ,  $p = 0.049$ . \*,  $p < 0.05$

## Supplemental Figure 4.

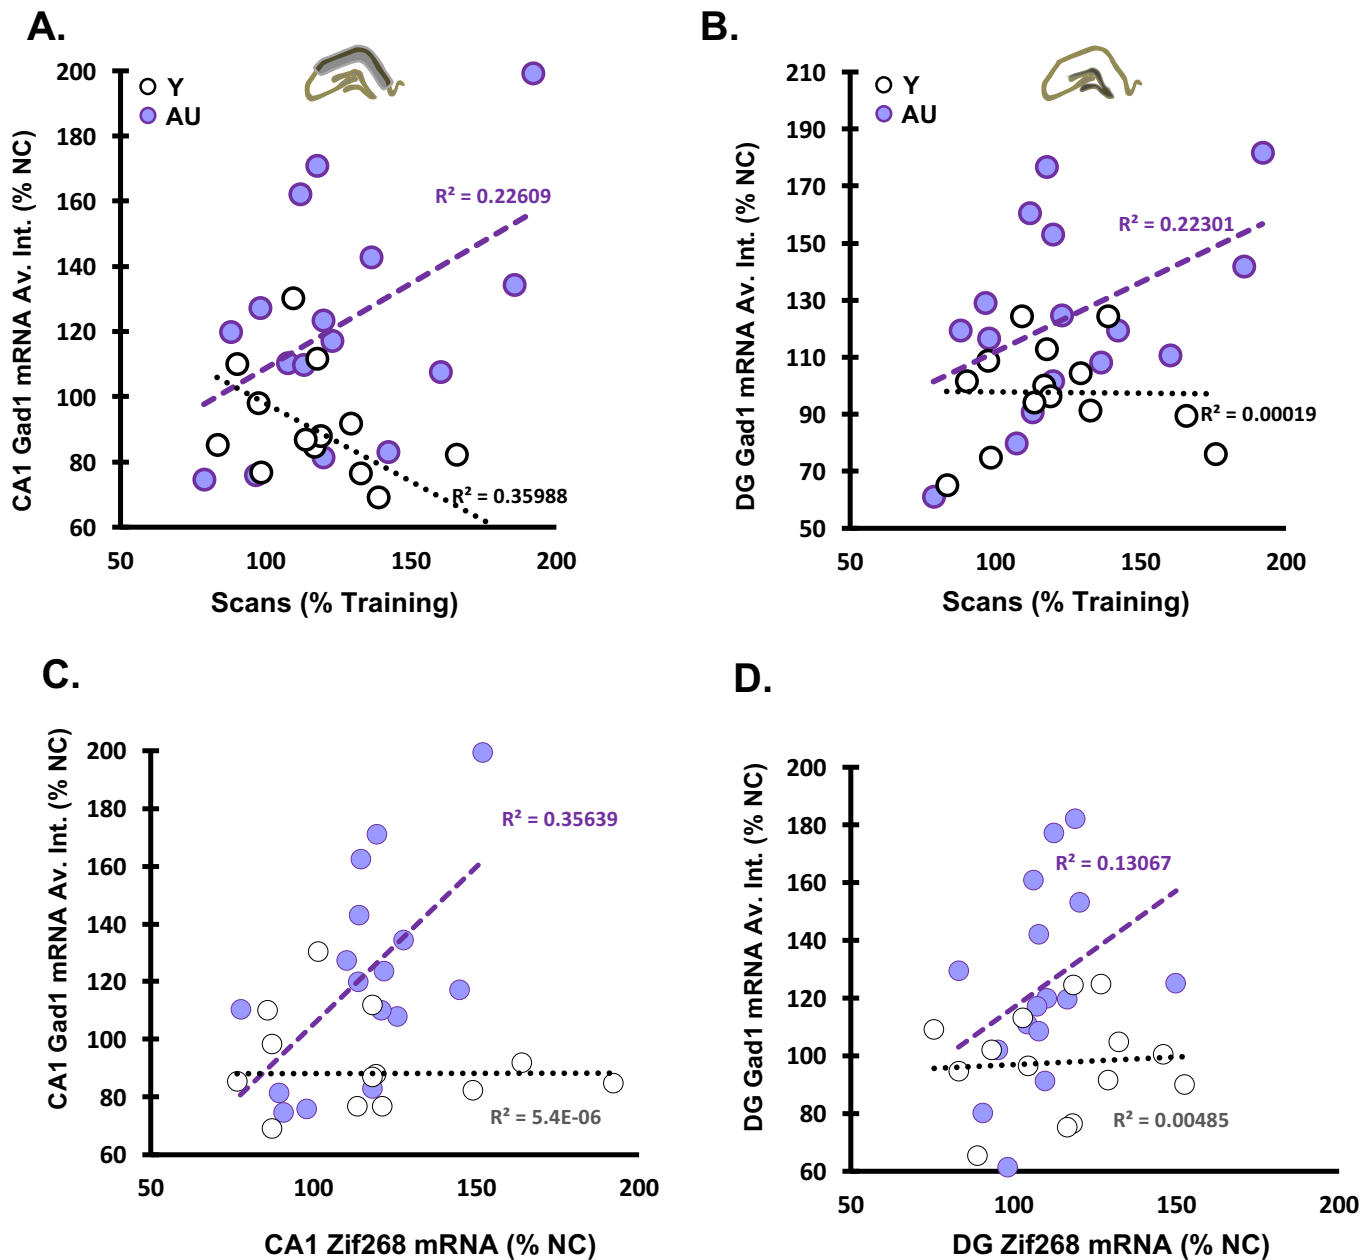

**Supplementary Figure 3.** CA1 and dentate gyrus correlations between Gad1 mRNA expression and scans or Zif268 show similar patterns as CA3. **A.** Gad1 mRNA shows a near significant positive correlation with test day scanning behavior (percent baseline) for CA1 across AU rats (Pearson  $r = 0.4755$ ,  $p = 0.0627$ ). In young rats, Gad1 mRNA is significantly negatively correlated with scans (Pearson  $r = -0.5999$ ,  $p = 0.0233$ ). These correlations are significantly different from each other (Fisher Z-transformation,  $Z = 2.95$ ,  $p = 0.0032$ ). **B.** Gad1 mRNA shows a near significant positive correlation with scanning behavior for DG across AU rats (Pearson  $r = 0.4722$ ,  $p = 0.0647$ ) while young rats show no correlation (Pearson  $r = -0.0139$ ,  $p = 0.9624$ ). **C.** In CA1, Gad1 mRNA is significantly correlated with Zif26 mRNA levels for AU rats (Pearson  $r = 0.5970$ ,  $p = 0.0146$ ) but no correlation was found in young rats (Pearson  $r = 0.0023$ ,  $p = 0.9937$ ). **D.** In DG, the positive correlation between Gad1 mRNA is and Zif26 mRNA does not reach significance in AU rats (Pearson  $r = 0.3615$ ,  $p = 0.1689$ ) with no correlation was found in young rats (Pearson  $r = 0.0697$ ,  $p = 0.8129$ ).
